# Supplementary material for: The Role of Catecholamines in Pathophysiological Liver Processes
Source: MDPI journal article supplement (doi:10.3390/cells11061021), 2022-03-17
Supplement: s1 [file s1]

## Supplementary Materials:

**Supplementary Table S1.** Primer sequences used for qPCR.

|              | Primer sequences (F: Forward / R: Reverse)            |
|--------------|-------------------------------------------------------|
| <i>DRD1</i>  | F: AGGGACTTCTCTGTTCGTATCC<br>R: GGAACCTGATAACGGCAGCA  |
| <i>DRD2</i>  | F: CTCTTCGGACTCAATAACGCAG<br>R: GACGATGGAGGAGTAGACCAC |
| <i>DRD3</i>  | F: AGAAGGCAACCCAAATGGTGG<br>R: TGTCGTGGCACTGTAAAGCTC  |
| <i>DRD4</i>  | F: CCACCAACTCCTTCATCGTG<br>R: TCGGAGTAGACGAAGAGCG     |
| <i>DRD5</i>  | F: CTCAACTGGCACAGGGAC<br>R: GATGAGCGAGGAAGAGATG       |
| <i>GAPDH</i> | F: TGCACCACCAACTGCTTAGC<br>R: GGCATGGACTGTGGTCATGAG   |

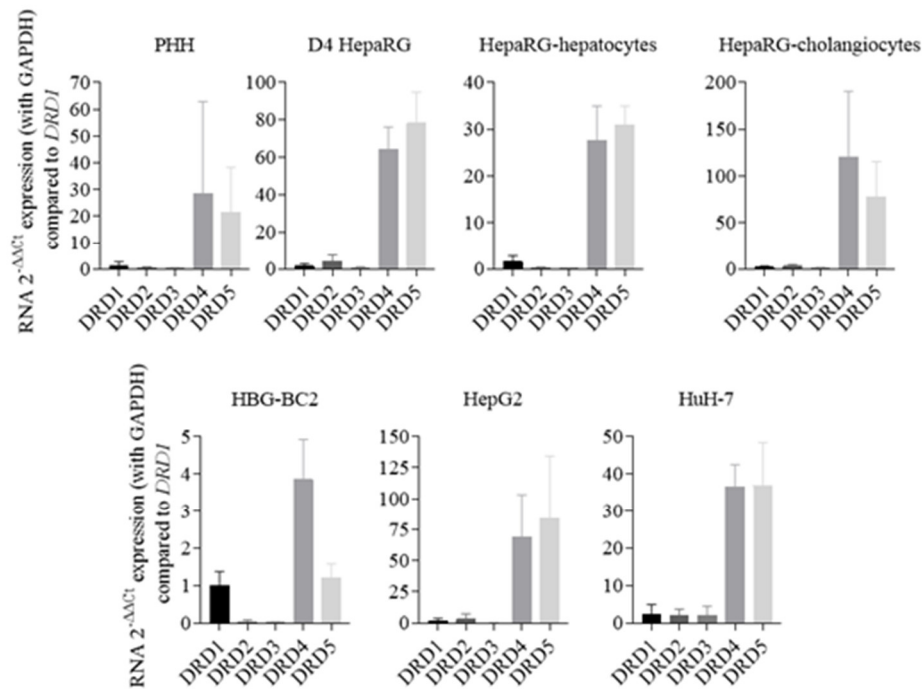

**Supplementary Figure S1.** Expression of the dopamine receptors mRNAs in primary human hepatocytes in culture (PHH) and in four hepatoma cell lines (HepG2, HepaRG, HuH-7, HBG-BC2). Expression of dopamine receptors (DRD) mRNAs has been analyzed by real-time quantitative polymerase chain reaction (5 ng of cDNA) in progenitors HepaRG cells (4 days of culture), differentiated HepaRG-hepatocytes, HepaRG-cholangiocytes, as well as in HepG2, HuH-7, HBG-BC2 cells, and PHH. mRNAs expressions were measured by the 2<sup>-ΔΔCT</sup> method using GAPDH as the house-keeping gene, and expression values were compared to DRD1 expression. All values are the mean of 3 independent experiments in triplicates, except for cholangiocytes-HepaRG (3 experiments with biological duplicates) and PHH (5 experiments with biological triplicates).
